# Supplementary material
Source: PubMed Central journal article supplement (PMC3003764)
Supplement: NIHMS212755-supplement-01.pdf [file NIHMS212755-supplement-01.pdf]

Supplementary Figure S1. Quality control methods and results, by individual and SNP.

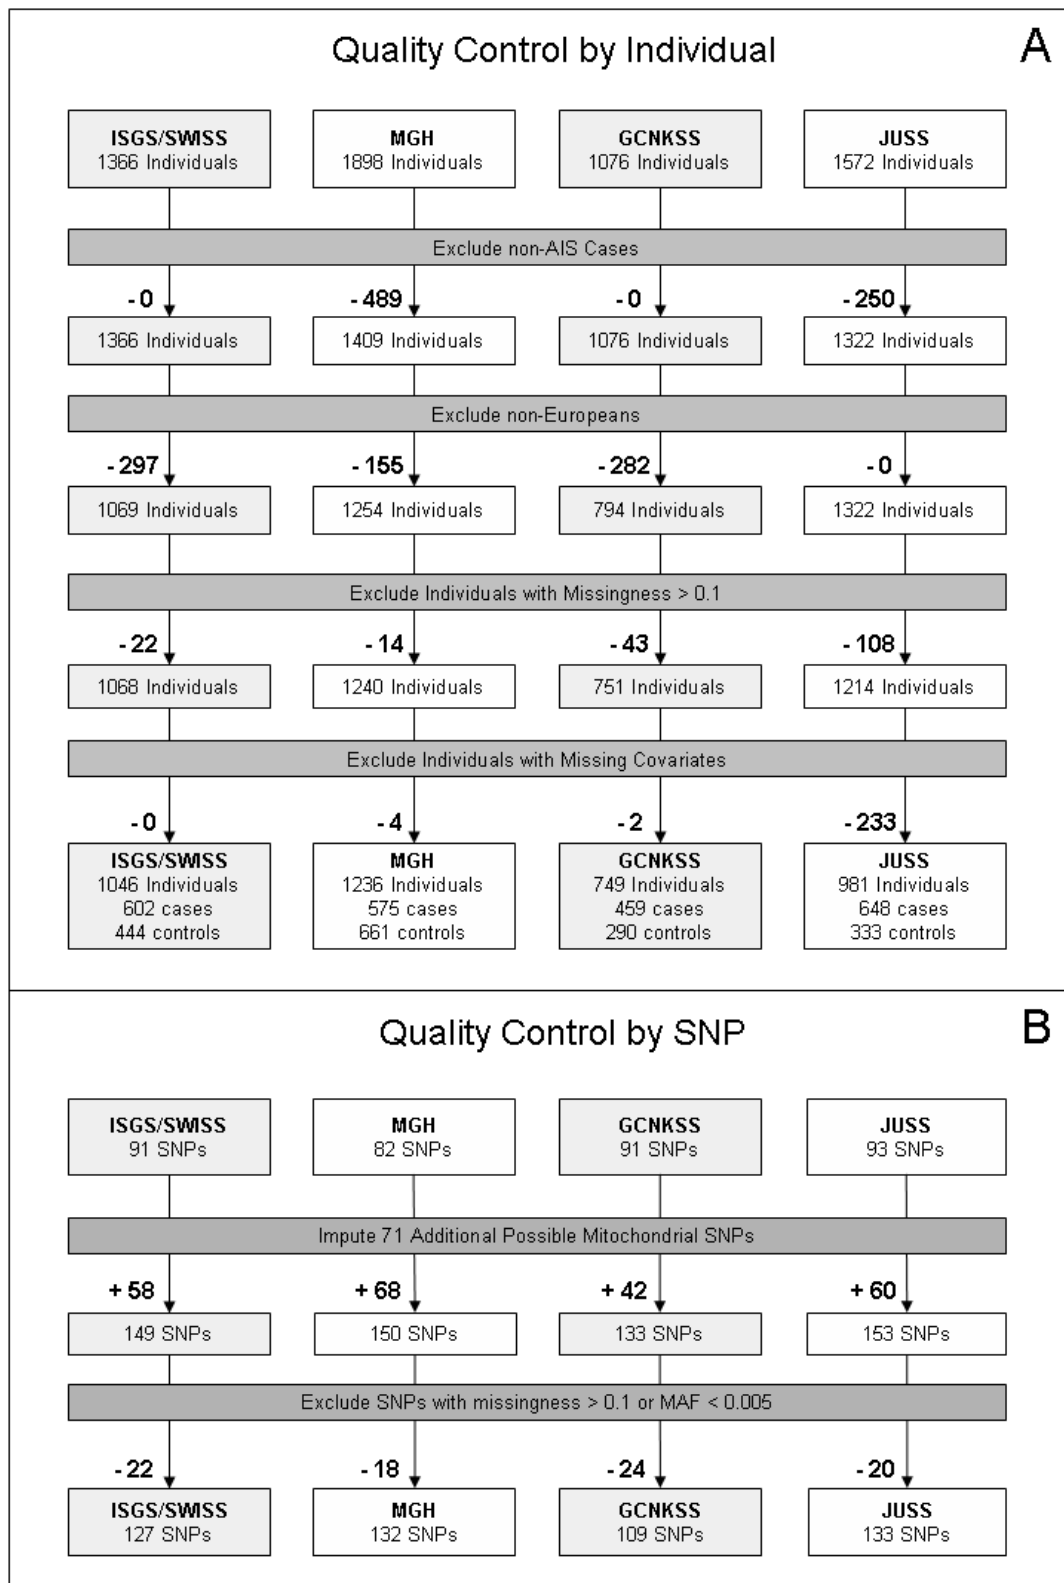

Supplementary Figure S1 Legend. A – Quality control by individual for each of the cohorts included in the present study. B – Quality control by SNP for each of the cohorts included in the present study. AIS = Acute Ischemic Stroke, GCNKSS = Greater Cincinnati Northern Kentucky Stroke Study, ISGS/SWISS = Ischemic Stroke Genetic Study/Siblings with Ischemic Stroke Study, JUSS = Jagiellonian University Stroke Study, MAF = Minor Allele Frequency, MGH = Massachusetts General Hospital Ischemic Stroke Genome-wide Association Study

Supplementary Figure S2. QQ – plot and mitochondrial genomic inflation factors after quality control

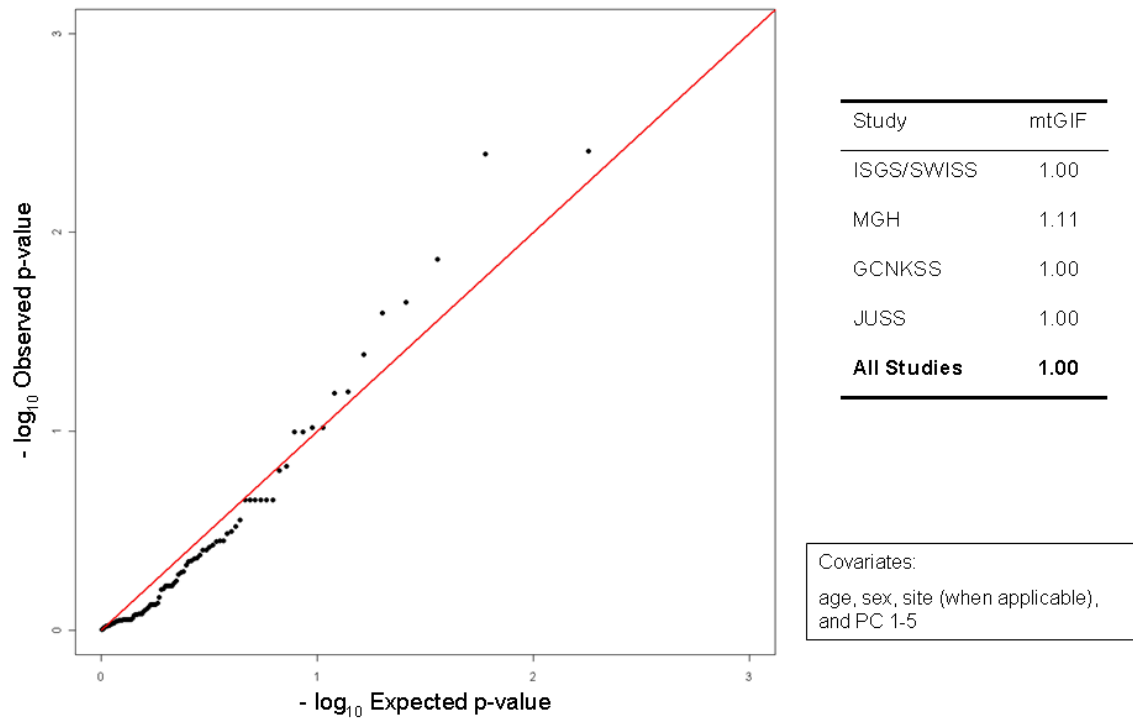

Supplementary Figure S2 Legend. GCNKSS = Greater Cincinnati Northern Kentucky Stroke Study, ISGS/SWISS = Ischemic Stroke Genetic Study/Siblings with Ischemic Stroke Study, JUSS = Jagiellonian University Stroke Study, MAF = Minor Allele Frequency, MGH = Massachusetts General Hospital Ischemic Stroke Genome-wide Association Study, mtGIF = mitochondrial Genomic Inflation Factor, PC = Principal Component

Supplementary Table S1. Single Nucleotide Polymorphism IDs, reference alleles, and beta coefficients for association with ischemic stroke.

| SNP     | ALLELE | BETA     |
|---------|--------|----------|
| mt150   | 4      | -0.001   |
| mt709   | 1      | -0.05119 |
| mt750   | 1      | 0.101654 |
| mt930   | 1      | -0.20371 |
| mt1189  | 2      | -0.03957 |
| mt1243  | 2      | 0.076961 |
| mt1719  | 1      | -0.13662 |
| mt1811  | 3      | -0.03263 |
| mt1888  | 1      | 0.026642 |
| mt2706  | 1      | 0.24998  |
| mt3010  | 1      | -0.03407 |
| mt3197  | 2      | 0.020783 |
| mt3394  | 2      | 0.175633 |
| mt3480  | 3      | -0.21159 |
| mt3505  | 3      | 0.076961 |
| mt3915  | 1      | -0.07764 |
| mt4216  | 2      | 0.109751 |
| mt4336  | 2      | -0.00682 |
| mt4529  | 1      | 0.01094  |
| mt4580  | 1      | -0.22602 |
| mt4793  | 3      | -0.01745 |
| mt4917  | 3      | 0.026642 |
| mt5046  | 3      | -0.03097 |
| mt5147  | 3      | -0.1879  |
| mt5495  | 2      | -0.01857 |
| mt5656  | 3      | 0.032467 |
| mt6221  | 2      | -0.20543 |
| mt6776  | 2      | 0.072321 |
| mt7028  | 2      | 0.249201 |
| mt7476  | 2      | 0.096219 |
| mt7768  | 1      | 0.099845 |
| mt8251  | 3      | 0.030529 |
| mt8697  | 1      | 0.026642 |
| mt8994  | 3      | -0.03097 |
| mt9055  | 1      | -0.21159 |
| mt9123  | 1      | 0.005982 |
| mt9477  | 1      | 0.020783 |
| mt9667  | 3      | 0.09349  |
| mt9698  | 2      | -0.21159 |
| mt9716  | 2      | -0.10993 |
| mt9899  | 2      | 0.08158  |
| mt10034 | 2      | 0.00995  |
| mt10238 | 2      | 0.002996 |
| mt10398 | 3      | 0.131905 |
| mt10550 | 3      | -0.21159 |
| mt10915 | 2      | 0.309688 |
| mt11251 | 1      | 0.156149 |

Supplementary Table S1 (continued).

| SNP     | ALLELE | BETA     |
|---------|--------|----------|
| mt11299 | 2      | -0.21159 |
| mt11377 | 1      | -0.02604 |
| mt11467 | 1      | -0.014   |
| mt11485 | 2      | -0.04972 |
| mt11674 | 4      | 0.076961 |
| mt11719 | 3      | -0.01288 |
| mt11812 | 3      | -0.19614 |
| mt11914 | 1      | -0.08219 |
| mt11947 | 1      | -0.03097 |
| mt12007 | 1      | -0.01349 |
| mt12308 | 1      | -0.014   |
| mt12372 | 1      | -0.04751 |
| mt12414 | 2      | -0.00884 |
| mt12705 | 4      | -0.15047 |
| mt13020 | 2      | -0.11777 |
| mt13105 | 3      | -0.13513 |
| mt13368 | 1      | 0.026642 |
| mt13617 | 2      | 0.020783 |
| mt13708 | 1      | -0.04825 |
| mt13734 | 2      | -0.05996 |
| mt13780 | 1      | 0.067659 |
| mt13934 | 4      | 0.129272 |
| mt13965 | 2      | -0.05774 |
| mt13966 | 3      | -0.28316 |
| mt14167 | 4      | -0.21159 |
| mt14182 | 2      | 0.168899 |
| mt14233 | 3      | -0.19614 |
| mt14687 | 3      | -0.05774 |
| mt14766 | 4      | -0.02634 |
| mt14793 | 3      | -0.0715  |
| mt14798 | 2      | -0.02634 |
| mt14905 | 1      | 0.026642 |
| mt15043 | 1      | -0.00612 |
| mt15218 | 3      | -0.04615 |
| mt15257 | 1      | 0.103459 |
| mt15452 | 2      | 0.156149 |
| mt15607 | 3      | 0.026642 |
| mt15758 | 3      | -0.02163 |
| mt15833 | 4      | 0.033435 |
| mt15904 | 2      | -0.15362 |
| mt15924 | 3      | -0.01359 |
| mt15928 | 1      | 0.026642 |
| mt16189 | 2      | -0.07032 |

Supplementary Table S1 Legend. Beta coefficients expressed as the natural logarithm of the odds ratio.

Allele 1 = Adenine, Allele 2 = Cytosine, Allele 3 = Guanine, Allele 4 = Thiamine.

Supplementary Table S2. Power calculations for haplogroup association tests in ischemic stroke.

| Haplogroup   | Expected Frequency in Controls <sup>1</sup> | Frequency in Cases to Detect Association <sup>2</sup> |                     | Minimum Effect Size (OR) Detectable <sup>3</sup> |                     |
|--------------|---------------------------------------------|-------------------------------------------------------|---------------------|--------------------------------------------------|---------------------|
|              |                                             | Risk Variants                                         | Protective Variants | Risk Variants                                    | Protective Variants |
| <b>H</b>     | 0.41                                        | 0.45                                                  | 0.37                | 1.18                                             | 0.84                |
| <b>H1</b>    | 0.14                                        | 0.17                                                  | 0.12                | 1.24                                             | 0.81                |
| <b>H2</b>    | 0.26                                        | 0.30                                                  | 0.23                | 1.21                                             | 0.83                |
| <b>J</b>     | 0.11                                        | 0.14                                                  | 0.085               | 1.35                                             | 0.74                |
| <b>K</b>     | 0.08                                        | 0.10                                                  | 0.06                | 1.33                                             | 0.75                |
| <b>preHV</b> | 0.06                                        | 0.13                                                  | 0.03                | 2.52                                             | 0.40                |
| <b>T</b>     | 0.13                                        | 0.16                                                  | 0.11                | 1.24                                             | 0.81                |
| <b>U</b>     | 0.15                                        | 0.18                                                  | 0.13                | 1.24                                             | 0.81                |
| <b>WX</b>    | 0.04                                        | 0.10                                                  | 0.016               | 2.58                                             | 0.39                |
| <b>I</b>     | 0.02                                        | 0.05                                                  | 0.007               | 2.80                                             | 0.36                |



Supplementary Table S2 Legend. All power calculations assume  $\alpha = 0.05$ , statistical power = 0.80

<sup>1</sup> Based on published data compiled in MitoMap ([www.mitomap.org](http://www.mitomap.org))

<sup>2</sup> For risk variants, this field reports the lowest haplogroup frequency in cases that can generate an association at  $\alpha = 0.05$  with statistical power = 0.80. For protective variants, the highest haplogroup frequency in cases compatible with an association at  $\alpha = 0.05$  with statistical power = 0 is reported.

<sup>3</sup> The weakest haplogroup-related odds ratio compatible with an association at  $\alpha = 0.05$  with statistical power = 0.80 is reported, as determined by comparison of reported haplogroup frequency.
